# Supplementary material
Source: publisher figshare collection journal article supplement (https://rs.figshare.com/ndownloader/files/21295779)
Supplement: Supplementary file [file 21295779]

**Table S1:** Support for the top five models for the analyses of total pecking behaviour across all birds ( $N = 49$ ) and two measures of solver behaviour ( $N = 30$ ; one solver was excluded from the ‘time (log) to open 1<sup>st</sup> lid’ analysis, as he participated in only the first trial). The intercept only model was the 10<sup>th</sup> ranked model for the total pecks analyses and we have included it for reference. AICc is the small sample Akaike Information criteria,  $\Delta AICc$  is the change in AICc relative to the top model, AICw (Akaike weight) is the conditional probability of the model.

| Response                                                                       | Model                                 | AICc   | $\Delta AICc$ | AICw |
|--------------------------------------------------------------------------------|---------------------------------------|--------|---------------|------|
| total pecks during all trials (all birds, $N = 49$ )                           | 1. experience + trial no. + age       | 625.39 | 0             | 0.19 |
|                                                                                | 2. experience + trial no.             | 625.52 | 0.12          | 0.18 |
|                                                                                | 3. experience + age                   | 625.94 | 0.55          | 0.14 |
|                                                                                | 4. experience                         | 626.08 | 0.68          | 0.13 |
|                                                                                | 5. experience + trial no. + age + sex | 626.53 | 1.14          | 0.11 |
|                                                                                | 10. intercept only                    | 701.81 | 76.42         | 0.00 |
| time (log) to open 1 <sup>st</sup> lid in all trials (solvers only, $N = 29$ ) | 1. sex + trial no.                    | 233.81 | 0             | 0.47 |
|                                                                                | 2. sex                                | 234.45 | 0.64          | 0.34 |
|                                                                                | 3. trial no.                          | 237.42 | 3.61          | 0.08 |
|                                                                                | 4. intercept only                     | 238.12 | 4.31          | 0.06 |
|                                                                                | 5. age + sex + trial no.              | 239.89 | 6.08          | 0.02 |
| no. of pecks to open 1st lid in trial 1 (solvers only, $N = 30$ )              | 1. age                                | 90.64  | 0             | 0.31 |
|                                                                                | 2. intercept only                     | 91.14  | 0.50          | 0.24 |
|                                                                                | 3. age + retention interval           | 92.78  | 2.15          | 0.11 |
|                                                                                | 4. age + sex                          | 92.87  | 2.23          | 0.10 |
|                                                                                | 5. retention interval                 | 93.12  | 2.48          | 0.09 |

**Table S2:** Multi-model averaged parameters for the analyses of total pecking behaviour across all birds ( $N = 49$ ) and of two measures of solver behaviour ( $N = 30$ ; one solver was excluded from the 'time (log) to open 1<sup>st</sup> lid' analysis, as he participated in only the first trial). For each predictor we list the relative variable importance (RVI, calculated as the sum of AIC weights for all models containing the predictor), the mean regression coefficient ( $\beta$ ), the SE and 95% CI for mean  $\beta$ .

| Response                                | Predictor          | RVI   | Mean $\beta$ | SE    | 95% CI |    |        |
|-----------------------------------------|--------------------|-------|--------------|-------|--------|----|--------|
| total pecks during trial                | <i>experience</i>  | 1     | 4.270        | 0.519 | 3.245  | to | 5.295  |
|                                         | trial no.          | 0.57  | -0.081       | 0.050 | -0.179 | to | 0.017  |
|                                         | age                | 0.52  | -0.092       | 0.061 | -0.212 | to | 0.028  |
|                                         | sex                | 0.36  | 0.264        | 0.266 | -0.263 | to | 0.790  |
| time (log) to open 1 <sup>st</sup> lid  | sex                | 0.86  | -0.650       | 0.236 | -1.119 | to | -0.180 |
|                                         | <i>trial no.</i>   | 0.58  | -0.243       | 0.101 | -0.443 | to | -0.043 |
|                                         | age                | 0.05  | -0.017       | 0.060 | -0.136 | to | 0.102  |
|                                         | retention interval | <0.01 | <0.001       | 0.001 | -0.002 | to | 0.002  |
| no. of pecks to open 1st lid in trial 1 | age                | 0.55  | 0.104        | 0.059 | -0.017 | to | 0.225  |
|                                         | retention interval | 0.26  | <0.001       | 0.001 | -0.002 | to | 0.003  |
|                                         | sex                | 0.25  | 0.150        | 0.289 | -0.442 | to | 0.743  |

**Table S3:** The average behaviour of the experienced ( $N = 32$ ) and naïve ( $N = 17$ ) toutouwai tested in the lid opening task in their first trial and across all trials. The group's mean value for each measure is shown, with the range given in brackets.

|                                       | Experienced     | Naïve       |
|---------------------------------------|-----------------|-------------|
| $N_{\text{solvers}}$                  | 30              | 0*          |
| Mean days since last test for solvers | 482 (313 – 683) | N/A         |
| <u>Trial 1:</u>                       |                 |             |
| time to 1 <sup>st</sup> worm (s)      | 11.9 (1 – 128)  | N/A         |
| no. pecks to 1 <sup>st</sup> worm     | 1.9 (1 – 5)     | N/A         |
| total pecks                           | 7.0 (0 – 61)    | 0           |
| <u>All trials:</u>                    |                 |             |
| time to 1 <sup>st</sup> worm (s)      | 6.9 (1 – 128)   | 224**       |
| no. pecks to 1 <sup>st</sup> worm     | 1.8 (1 – 5)     | 1**         |
| total pecks                           | 6.5 (0 – 61)    | 0.1 (0 – 3) |

\*Excludes a male that opened one lid with his foot 1 min into his final trial, and then pecked lid fully open 1 min later to retrieve the partially visible worm.

\*\*These values include the single trial described above, as only one lid was fully opened by the naïve group in total.
